# Supplementary material for: Gestational age-dependency of height and body mass index trajectories during the first 3 years in Japanese small-for-gestational age children
Source: PubMed Central journal article supplement (PMC5146673; doi:10.1038/srep38659), 2016-12-09
Supplement: srep38659-s1.pdf [file srep38659-s1.pdf]

## **Gestational age-dependency of height and body mass index trajectory during the first 3 years in Japanese small-for-gestational age children**

Kaori Maeyama<sup>1</sup>, Ichiro Morioka<sup>1,\*</sup>, Sota Iwatani<sup>1</sup>, Sachiyo Fukushima<sup>1</sup>, Daisuke Kurokawa<sup>1</sup>, Keiji Yamana<sup>1</sup>, Kosuke Nishida<sup>1</sup>, Shohei Ohyama<sup>1</sup>, Kazumichi Fujioka<sup>1</sup>, Hiroyuki Awano<sup>1</sup>, Mariko Taniguchi-Ikeda<sup>1</sup>, Kandai Nozu<sup>1</sup>, Hiroaki Nagase<sup>1</sup>, Noriyuki Nishimura<sup>1</sup>, Chika Shirai<sup>2</sup>, Kazumoto Iijima<sup>1</sup>

<sup>1</sup>Department of Pediatrics, Kobe University Graduate School of Medicine, Kobe 6500017, Japan

<sup>2</sup>Kobe City Public Health Center, Kobe 6508570, Japan

\*Correspondence and requests for materials should be addressed to:

Ichiro Morioka, MD, PhD

Department of Pediatrics, Kobe University Graduate School of Medicine

7-5-2, Kusunoki-cho, Chuo-ku, Kobe 650-0017, Japan.

Phone: +81-78-382-6090, Fax: +81-78-382-6099, E-mail: [ichim@med.kobe-u.ac.jp](mailto:ichim@med.kobe-u.ac.jp)

Supplementary Table S1. Longitudinal data for height and body mass index in small-for-gestational age children

A. Height

|                | At birth    | 4 months    | 9 months    | 1.5 years   | 3 years     |
|----------------|-------------|-------------|-------------|-------------|-------------|
| 39–41 weeks GA | 45.6 ± 1.49 | 61.1 ± 1.99 | 68.3 ± 2.31 | 78.2 ± 2.50 | 91.6 ± 3.25 |
| 37–38 weeks GA | 43.5 ± 1.93 | 59.9 ± 2.23 | 67.7 ± 2.37 | 77.9 ± 2.75 | 91.5 ± 3.59 |
| 34–36 weeks GA | 41.0 ± 2.29 | 58.6 ± 2.43 | 67.7 ± 2.63 | 77.4 ± 2.78 | 91.0 ± 2.75 |
| <34 weeks GA   | 34.6 ± 4.23 | 56.9 ± 3.02 | 66.8 ± 2.88 | 76.6 ± 2.82 | 91.3 ± 3.49 |

B. Height SDS

|                | At birth       | 4 months       | 9 months       | 1.5 years      | 3 years       |
|----------------|----------------|----------------|----------------|----------------|---------------|
| 39–41 weeks GA | -2.11 ± 0.72   | -0.84 ± 0.86   | -0.97 ± 1.00   | -0.80 ± 0.88   | -0.79 ± 0.92  |
| 37–38 weeks GA | -2.06 ± 0.75   | -1.41 ± 0.96** | -1.27 ± 0.94** | -0.93 ± 0.97*  | -0.83 ± 1.01  |
| 34–36 weeks GA | -1.93 ± 0.69   | -2.25 ± 1.01** | -1.45 ± 1.04** | -1.25 ± 0.93** | -1.04 ± 0.77* |
| <34 weeks GA   | -2.74 ± 1.07** | -3.26 ± 1.28** | -1.93 ± 1.02** | -1.41 ± 1.02** | -0.93 ± 1.09  |

C. Catch-up rate for height

|                | At birth | 4 months     | 9 months     | 1.5 years    | 3 years     |
|----------------|----------|--------------|--------------|--------------|-------------|
| 39–41 weeks GA | 0 (0.0)  | 658 (91.0)   | 682 (94.3)   | 701 (97.0)   | 706 (97.6)  |
| 37–38 weeks GA | 0 (0.0)  | 185 (72.3)** | 216 (84.4)** | 232 (90.6)** | 242 (94.5)* |
| 34–36 weeks GA | 0 (0.0)  | 23 (37.1)**  | 45 (72.6)**  | 51 (82.3)**  | 58 (93.5)   |
| <34 weeks GA   | 0 (0.0)  | 3 (13.6)**   | 9 (40.9)**   | 16 (72.7)**  | 20 (90.9)*  |

D. BMI

|                | At birth       | 4 months       | 9 months       | 1.5 years      | 3 years        |
|----------------|----------------|----------------|----------------|----------------|----------------|
| 39–41 weeks GA | 12.4 ± 1.74    | 16.7 ± 1.44    | 16.8 ± 1.41    | 15.8 ± 1.12    | 15.5 ± 1.14    |
| 37–38 weeks GA | 11.8 ± 2.25    | 16.7 ± 1.37    | 16.9 ± 1.36    | 15.8 ± 1.31    | 15.3 ± 1.18    |
| 34–36 weeks GA | 10.0 ± 1.60    | 15.9 ± 1.45    | 16.0 ± 1.39    | 15.2 ± 1.11    | 14.8 ± 1.18    |
| <34 weeks GA   | 10.2 ± 4.21    | 15.8 ± 1.68    | 15.7 ± 1.92    | 15.0 ± 1.06    | 14.4 ± 1.06    |
| E. BMI SDS     |                |                |                |                |                |
|                | At birth       | 4 months       | 9 months       | 1.5 years      | 3 years        |
| 39–41 weeks GA | -0.23 ± 1.53   | -0.22 ± 0.99   | 0.014 ± 1.03   | -0.052 ± 0.90  | 0.046 ± 0.89   |
| 37–38 weeks GA | -0.77 ± 1.98** | -0.24 ± 0.94   | 0.043 ± 0.98   | -0.050 ± 1.04  | -0.086 ± 0.97  |
| 34–36 weeks GA | -2.37 ± 1.47** | -0.87 ± 0.99** | -0.66 ± 1.02** | -0.60 ± 0.91** | -0.59 ± 1.02** |
| <34 weeks GA   | -2.30 ± 3.71** | -0.90 ± 1.22** | -0.73 ± 1.44** | -0.67 ± 0.92** | -0.86 ± 0.99** |

Data are shown as mean ± standard deviation and number (%). BMI, body mass index; GA, gestational age; SDS, standard deviation score. \*p < 0.05 and \*\*p < 0.01 compared with 39–41 weeks GA.
